# Supplementary material for: Marijuana-derived Δ-9-tetrahydrocannabinol suppresses Th1/Th17 cell-mediated delayed-type hypersensitivity through microRNA regulation
Source: Springer Nature journal article supplement (doi:10.1007/s00109-016-1404-5), 2016-04-01
Supplement: 109_2016_1404_MOESM1_ESM.pdf [file 109_2016_1404_MOESM1_ESM.pdf]

## Electronic supplementary material

### Marijuana derived $\Delta$ -9-tetrahydrocannabinol suppresses Th1/Th17 cell-mediated delayed-type hypersensitivity through microRNA regulation

Jessica M Sido et al – Journal of Molecular Medicine 2016

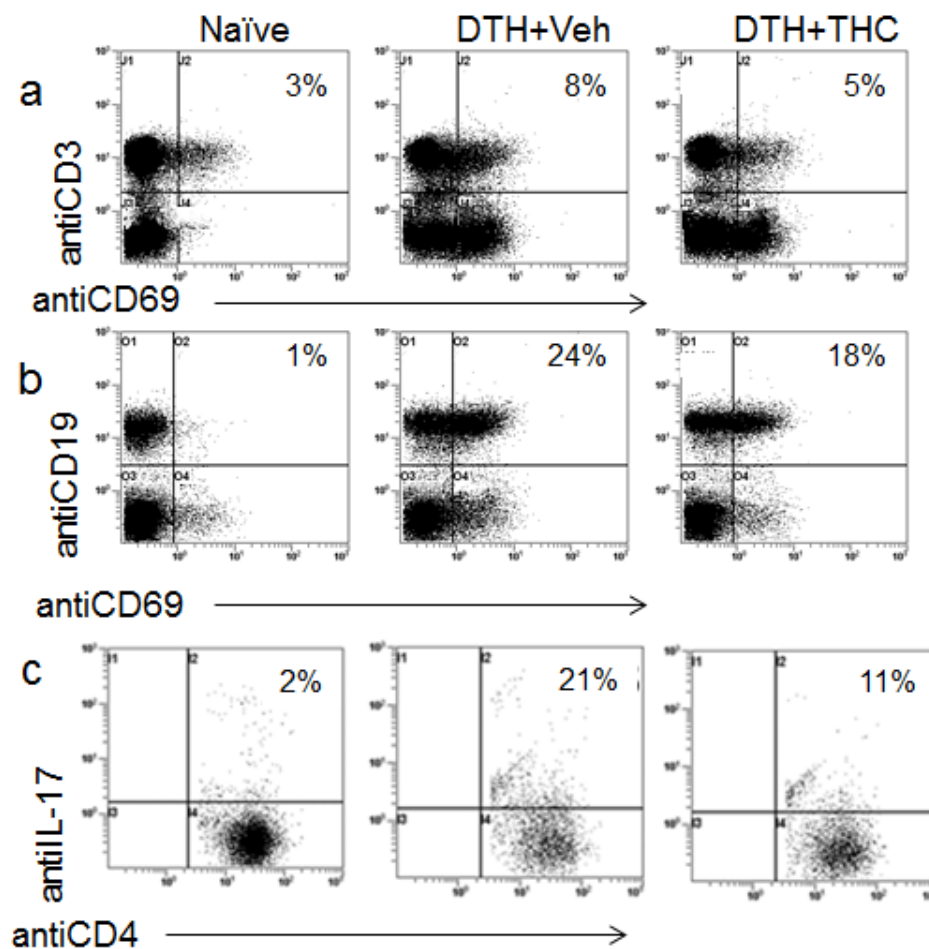

**Supp. Fig. 1 THC treatment reduces activated lymphocyte proportions**

DTH induced mice were treated with THC or vehicle (n=5 per experimental group) and the PopLN assessed for the early activation marker CD69. (a & b) Flow cytometry dot plots (gated on live cells) showing (a) CD3+CD69+ and (b) CD19+CD69+ cells. Cells from the draining LN were cultured in the presence of PMA, Inomycin, and Golgi Plug (4 hours) and stained for IL-17a secreting cells. (c) Flow cytometry dot plots (gated on CD4) showing CD4+IL-17a+. Representative data from replicate experiments.
